# Supplementary material for: NMR metabolite quantification of a synthetic urine sample: an inter-laboratory comparison of processing workflows
Source: PubMed Central journal article supplement (PMC10328857; doi:10.1007/s11306-023-02028-4), 2023-07-07
Supplement: 11306_2023_2028_MOESM1_ESM.pdf [file 11306_2023_2028_MOESM1_ESM.pdf]

## SUPPLEMENTARY INFORMATION

Metabolomics

Article title: **NMR metabolite quantification of a synthetic urine sample: an inter-laboratory comparison of processing workflows**

Cécile Canlet<sup>1\*</sup>, Catherine Deborde<sup>2\*</sup>, Edern Cahoreau<sup>3</sup>, Grégory Da Costa<sup>4</sup>, Roselyne Gautier<sup>1</sup>, Daniel Jacob<sup>2</sup>, Cyril Jousse<sup>5</sup>, Méliá Lacaze<sup>1</sup>, Inès Le Mao<sup>4</sup>, Estelle Martineau<sup>6,7</sup>, Lindsay Peyriga<sup>3</sup>, Tristan Richard<sup>4</sup>, Virginie Silvestre<sup>6</sup>, Mounir Traïkia<sup>5</sup>, Annick Moing<sup>2,5</sup>, Patrick Giraudeau<sup>6,5</sup>

<sup>1</sup> Toxalim (Research Centre in Food Toxicology), Toulouse University, INRAE UMR 1331, ENVT, INP-Purpan, UPS, Toulouse, France, Metatoul-AXIOM Platform, National Infrastructure for Metabolomics and Fluxomics: MetaboHUB, Toxalim, INRAE, F-31027, Toulouse, France

<sup>2</sup> INRAE, Univ. Bordeaux, Biologie du Fruit et Pathologie, UMR1332, Metabolome Bordeaux - MetaboHUB, Centre INRAE de Nouvelle-Aquitaine Bordeaux, F-33140 Villenave d'Ornon, France

<sup>3</sup> TBI, Université de Toulouse, CNRS, INRAE, INSA, MetaboHUB-MetaToul, National Infrastructure of Metabolomics & Fluxomics (ANR-11-INBS-0010), F-31077, Toulouse, France

<sup>4</sup> Univ. Bordeaux, Bordeaux INP, INRAE, OENO, UMR 1366, ISVV, Metabolome Bordeaux - MetaboHUB, F-33140 Villenave d'Ornon, France

<sup>5</sup> Université Clermont Auvergne, Clermont Auvergne INP, CNRS, Institut de Chimie de Clermont-Ferrand, F-63000 Clermont-Ferrand, France. Université Clermont Auvergne, INRAE, UNH, Plateforme d'Exploration du Métabolisme, MetaboHUB Clermont, Clermont-Ferrand, France.

<sup>6</sup> Nantes Université, CNRS, CEISAM UMR 6230, F-44000 Nantes, France

<sup>7</sup> CAPACITES SAS, F-44200 Nantes, France

Corresponding authors: [annick.moing@inrae.fr](mailto:annick.moing@inrae.fr), [patrick.giraudeau@univ-nantes.fr](mailto:patrick.giraudeau@univ-nantes.fr)

**Online Resource 1** Preparation and metabolite concentrations of synthetic urine and calibration-range solutions.

### Preparation of the solutions

The synthetic urine sample was prepared in ultrapure water by gravimetric method (Sartorius analytical balance, Gottingen, Germany) with known amounts of 32 commercial metabolites. The blank solution was prepared from a potassium phosphate solution (20 mM) supplemented with KCl (100 mM), NaCl (290 mM), NaOH (32 mM), NaHCO<sub>3</sub> (11 mM), H<sub>2</sub>SO<sub>4</sub> (10 mM) and urea (820 mM) in ultrapure water. In a 50 ml volumetric flask, 25 ml of blank solution were added with volumes of the pure metabolite solutions, and the volume was complemented with ultrapure water. Fifteen ml of synthetic urine were then mixed with 6 ml of sodium and potassium phosphate buffer solution (200

mM, pH 7.4). The pH of 900  $\mu$ l of the final synthetic urine was adjusted to pH  $7.4 \pm 0.02$  with NaOD or DCI 1-M solutions (1.2  $\mu$ l added on average) using a titration pH unit (BTpH, Bruker, Karlsruhe, Germany). A volume of 630  $\mu$ l of this pH-adjusted synthetic urine was supplemented with 70  $\mu$ l D<sub>2</sub>O containing 3-trimethylsilyl-propionic-2,2,3,3-*d*4 acid sodium salt (TSP, 258  $\mu$ M in NMR tube). Depending on the metabolites, the metabolite concentration in the NMR tube ranged from 64 to 7,959  $\mu$ M. Five calibration-range solutions containing the 32 compounds with concentrations ranging from 0.1 to 12 mM were also prepared and their pH was adjusted. The calibration solutions were also supplemented with TSP for chemical shift calibration.

**Metabolite concentrations.** Concentrations in the NMR tube ( $\mu$ M).

| Metabolites                                                                       | Synthetic urine ( $\mu$ M) | Cal-1   | Cal-2   | Cal-3   | Cal-4   | Cal-5  |
|-----------------------------------------------------------------------------------|----------------------------|---------|---------|---------|---------|--------|
| 1-methyl-L-histidine<br>(HMDB0000001 <sup>a</sup> ;<br>CHEBI:70958 <sup>b</sup> ) | 127.66                     | 291.60  | 207.36  | 129.60  | 97.20   | 64.80  |
| (S)-2-hydroxybutyric acid<br>(HMDB000008 ;<br>CHEBI:1148)                         | 398.06                     | 583.95  | 486.62  | 389.30  | 291.97  | 194.65 |
| 3-methyl-L-histidine<br>(HMDB00479 ;<br>CHEBI:70959)                              | 120.82                     | 206.74  | 161.52  | 122.75  | 96.91   | 64.61  |
| Acetic acid<br>(HMDB000042 ;<br>CHEBI:15366)                                      | 359.13                     | 64.02   | 192.05  | 358.49  | 576.14  | 768.19 |
| Alanine<br>(HMDB0000042 ;<br>CHEBI:16449)                                         | 176.17                     | 259.07  | 226.69  | 174.87  | 129.54  | 64.77  |
| Allantoin<br>(HMDB0000462 ;<br>CHEBI:15676)                                       | 159.68                     | 65.44   | 111.25  | 157.06  | 196.33  | 242.14 |
| Citric acid<br>(HMDB0000094 ;<br>CHEBI:30769)                                     | 3442.75                    | 4496.13 | 3853.82 | 3211.52 | 1926.91 | 642.30 |
| Creatine<br>(HMDB0000064 ;<br>CHEBI:16919)                                        | 365.70                     | 1028.34 | 706.99  | 372.77  | 224.95  | 64.27  |

|                                                             |         |         |         |         |          |          |
|-------------------------------------------------------------|---------|---------|---------|---------|----------|----------|
| <b>Creatinine</b><br>(HMDB0000562 ;<br>CHEBI:16737)         | 7959.38 | 3857.53 | 5786.30 | 7715.06 | 10286.75 | 12858.44 |
| <b>L-Cysteine</b><br>(HMDB0000574 ;<br>CHEBI:17561)         | 265.58  | 128.61  | 192.92  | 263.65  | 321.53   | 385.83   |
| <b>Dimethylamine</b><br>(HMDB0000087 ;<br>CHEBI:17170)      | 323.48  | 398.54  | 365.33  | 318.83  | 265.69   | 199.27   |
| <b>Ethanolamine</b><br>(HMDB0000149 ;<br>CHEBI:16000)       | 185.76  | 70.10   | 126.17  | 182.25  | 266.37   | 350.49   |
| <b>Formic acid</b><br>(HMDB0000142 ;<br>CHEBI:30751)        | 163.91  | 260.18  | 208.14  | 162.61  | 110.58   | 65.04    |
| <b>Fructose</b><br>(CHEBI:28757)                            | 63.93   | 32.29   | 48.43   | 64.58   | 96.86    | 129.15   |
| <b>D-(+) Glucose</b><br>(HMDB0000122 ;<br>CHEBI:17634)      | 247.75  | 450.45  | 321.75  | 244.53  | 160.88   | 64.35    |
| <b>L-Glutamine</b><br>(HMDB0000641 ;<br>CHEBI:18050)        | 265.34  | 385.48  | 321.23  | 263.41  | 192.74   | 128.49   |
| <b>Glycerol</b><br>(HMDB0000131 ;<br>CHEBI:17754)           | 160.15  | 64.58   | 109.78  | 161.44  | 245.39   | 322.88   |
| <b>Glycine</b><br>(HMDB0000123 ;<br>CHEBI:15428)            | 1205.27 | 3222.64 | 2255.85 | 1289.06 | 966.79   | 644.53   |
| <b>Guanidoacetic acid</b><br>(HMDB0000128 ;<br>CHEBI:16344) | 706.51  | 64.23   | 449.60  | 770.74  | 867.09   | 963.43   |
| <b>Hippuric acid</b><br>(HMDB0000714 ;<br>CHEBI:18089)      | 2043.63 | 4498.56 | 3213.26 | 1927.95 | 1285.30  | 642.65   |
| <b>L-Histidine</b><br>(HMDB0000177 ;<br>CHEBI:15971)        | 482.38  | 256.59  | 384.88  | 481.10  | 545.24   | 641.46   |
| <b>Indoxylsulfate</b><br>(HMDB0000682 ;<br>CHEBI:43355)     | 156.07  | 191.89  | 172.70  | 153.51  | 108.74   | 63.96    |

|                                                                        |         |         |         |         |          |          |
|------------------------------------------------------------------------|---------|---------|---------|---------|----------|----------|
| <b>Isocitric acid</b><br>(HMDB0000193 ;<br>CHEBI:30887)                | 462.96  | 644.79  | 548.07  | 483.59  | 386.87   | 257.91   |
| <b>L-Lactic acid</b><br>(HMDB0000190;<br>CHEBI:422)                    | 96.54   | 146.08  | 120.68  | 95.27   | 82.57    | 63.51    |
| <b>L-Lysine</b><br>(HMDB0000182 ;<br>CHEBI:18019)                      | 144.31  | 64.71   | 103.54  | 142.37  | 187.67   | 232.97   |
| <b>Myo-inositol</b><br>(HMDB0000211 ;<br>CHEBI:17268)                  | 148.81  | 172.44  | 159.67  | 146.90  | 102.19   | 63.87    |
| <b>Phenylacetyl-L-<br/>glutamine</b><br>(HMDB00006344;<br>CHEBI:17884) | 373.39  | 64.16   | 224.55  | 372.11  | 481.18   | 641.57   |
| <b>L-Pyroglutamic acid</b><br>(HMDB0000267 ;<br>CHEBI:18183)           | 229.27  | 449.55  | 321.11  | 231.20  | 160.55   | 64.22    |
| <b>L-Serine</b><br>(HMDB0000187 ;<br>CHEBI:17115)                      | 208.79  | 129.69  | 162.11  | 207.50  | 259.37   | 324.21   |
| <b>L-Threonine</b><br>(HMDB0000167 ;<br>CHEBI:16857)                   | 119.51  | 64.95   | 90.93   | 116.91  | 155.88   | 194.85   |
| <b>Trigonelline</b><br>(HMDB0000875 ;<br>CHEBI:18123)                  | 129.72  | 65.19   | 162.96  | 247.71  | 521.49   | 880.01   |
| <b>Trimethylamine N-<br/>oxide</b><br>(HMDB0000925 ;<br>CHEBI:15724)   | 944.69  | 321.32  | 642.64  | 963.96  | 1285.29  | 1606.61  |
| <b>Creatine + Creatinine</b>                                           | 8325.08 | 4885.88 | 6493.28 | 8087.84 | 10511.70 | 12922.71 |
| <b>L-Lactic acid +<br/>L -Threonine</b>                                | 216.05  | 211.03  | 211.61  | 212.18  | 238.45   | 258.36   |

<sup>a</sup> HMDB: Human Metabolome Database, identifier from [www.hmdb.ca](http://www.hmdb.ca)

<sup>b</sup> CHEBI: Chemical Entities of Biological Interest, identifier from <https://www.ebi.ac.uk/chebi/init.do>

**Online Resource 2.** Strategies used for processing 1D-zgpr and NOESYpr spectra of urine for compound quantification.

| Strategy code | Integration module<br>and mode   | Calibration mode                                         | Number of operators for |         |
|---------------|----------------------------------|----------------------------------------------------------|-------------------------|---------|
|               |                                  |                                                          | zgpr                    | NOESYpr |
| PI1-TSPref    | TopSpin, peak<br>integration     | internal referencing with TSP                            | 6                       |         |
| PI1-ExtCal    | TopSpin, peak<br>integration     | external calibration with<br>calibration-range solutions | 6                       | 5       |
| PI2-ExtCal    | NMRProcFlow, peak<br>integration | external calibration with<br>calibration-range solutions | 1                       |         |
| DC1-ExtCal    | Mnova,<br>deconvolution          | external calibration with<br>calibration-range solutions | 1                       |         |
| DC2-ExtCal    | NMRDeconvR,<br>deconvolution     | external calibration with<br>calibration-range solutions | 1                       | 1       |

**Online Resource 3** Spectral regions (left and right limits in ppm) selected for signal integration in synthetic urine and calibration range spectra for metabolite quantification using zgpr spectra with peak integration and external calibration.

| Metabolite            | Integration mode and operator |       |       |       |       |       |       |       |       |       |       |       |       |       |
|-----------------------|-------------------------------|-------|-------|-------|-------|-------|-------|-------|-------|-------|-------|-------|-------|-------|
|                       | PI1                           |       | PI1   |       | PI1   |       | PI1   |       | PI1   |       | PI1   |       | PI2   |       |
|                       | Op. 1                         | Op. 2 | Op. 2 | Op. 2 | Op. 3 | Op. 3 | Op. 4 | Op. 4 | Op.5  | Op.5  | Op.6  | Op.6  | Op. 2 | Op. 2 |
| 1-methylhistidine     | 7.010                         | 6.990 | 7.010 | 6.992 | 7.013 | 6.984 | 7.013 | 6.986 | 7.011 | 6.986 | 7.009 | 6.990 | 7.010 | 6.993 |
| 2-hydroxybutyric acid | 0.930                         | 0.880 | 1.699 | 1.616 | 0.935 | 0.868 | 0.937 | 0.871 | 0.937 | 0.866 | 0.942 | 0.859 | 0.925 | 0.883 |
| 3-methylhistidine     | 7.030                         | 7.010 | 7.030 | 7.007 | 7.039 | 7.013 | 7.046 | 7.013 | 7.034 | 7.011 | 7.032 | 7.009 | 7.030 | 7.012 |
| Acetic acid           | 1.930                         | 1.915 | 1.929 | 1.916 | 1.93  | 1.914 | 1.931 | 1.917 | 1.929 | 1.919 | 1.929 | 1.918 | 1.929 | 1.918 |
| Alanine               | 1.500                         | 1.470 | 1.498 | 1.47  | 1.508 | 1.453 | 1.504 | 1.468 | 1.498 | 1.468 | 1.498 | 1.469 | 1.498 | 1.470 |
| Allantoin             | 5.405                         | 5.390 | 5.411 | 5.386 | 5.412 | 5.383 | 5.405 | 5.387 | 5.415 | 5.380 | 5.406 | 5.380 | 5.404 | 5.390 |
| Citric acid           | 2.690                         | 2.635 | 2.691 | 2.638 | 2.692 | 2.635 | 2.695 | 2.637 | 2.695 | 2.632 | 2.690 | 2.634 | 2.689 | 2.664 |
| Creatine              | 3.946                         | 3.925 | 3.942 | 3.927 | 3.943 | 3.927 | 3.943 | 3.928 | 3.951 | 3.923 | 3.944 | 3.927 | 3.050 | 3.032 |
| Creatinine            | 4.070                         | 4.050 | 4.067 | 4.053 | 4.069 | 4.047 | 4.068 | 4.049 | 4.070 | 4.049 | 4.069 | 4.052 | 3.058 | 3.038 |
| Cystine <sup>a</sup>  | ND                            |       | ND    |       | ND    |       | ND    |       | ND    |       | ND    |       | 3.381 | 3.366 |
| Dimethylamine         | 2.735                         | 2.715 | 2.736 | 2.717 | 2.745 | 2.709 | 2.739 | 2.708 | 2.738 | 2.716 | 2.739 | 2.712 | 2.738 | 2.716 |
| Ethanolamine          | ND                            |       | 3.824 | 3.819 | ND    |       | ND    |       | ND    |       | ND    |       | ND    |       |
| Formic acid           | 8.470                         | 8.450 | 8.478 | 8.445 | 8.469 | 8.453 | 8.470 | 8.447 | 8.489 | 8.438 | 8.480 | 8.440 | 8.466 | 8.456 |
| Fructose              | 3.920                         | 3.890 | ND    |       | 3.921 | 3.888 | 3.922 | 3.887 | ND    |       | 3.920 | 3.889 | ND    |       |
| Glucose               | 5.250                         | 5.230 | 5.249 | 5.234 | 5.26  | 5.226 | 5.257 | 5.224 | 5.253 | 5.226 | 5.250 | 5.226 | 3.503 | 3.495 |
| Glutamine             | ND                            |       | 2.471 | 2.458 | ND    |       | ND    |       | ND    |       | ND    |       | 2.166 | 2.158 |
| Glycerol              | ND                            |       | 3.670 | 3.664 | ND    |       | ND    |       | ND    |       | ND    |       | 3.656 | 3.651 |
| Glycine               | 3.572                         | 3.558 | 3.570 | 3.562 | 3.576 | 3.559 | 3.58  | 3.558 | 3.570 | 3.558 | 3.578 | 3.558 | 3.573 | 3.560 |
| Guanidoacetic acid    | 3.805                         | 3.795 | 3.805 | 3.797 | 3.804 | 3.793 | 3.804 | 3.798 | 3.808 | 3.797 | 3.807 | 3.797 | 3.805 | 3.795 |
| Hippuric acid         | 7.670                         | 7.620 | 7.587 | 7.528 | 7.59  | 7.53  | 7.582 | 7.531 | 7.673 | 7.604 | 7.670 | 7.610 | 7.662 | 7.649 |
| Histidine             | 7.090                         | 7.060 | 7.090 | 7.055 | 7.093 | 7.062 | 7.092 | 7.058 | 7.092 | 7.058 | 7.100 | 7.050 | 7.081 | 7.066 |
| Indoxylsulfate        | 7.230                         | 7.109 | 7.524 | 7.498 | 7.237 | 7.181 | 7.234 | 7.181 | 7.236 | 7.185 | 7.227 | 7.180 | 7.721 | 7.711 |
| Isocitric acid        | 3.000                         | 2.951 | 2.999 | 2.951 | 3.002 | 2.949 | 3.000 | 2.952 | 2.998 | 2.954 | 3.004 | 2.947 | 2.435 | 2.427 |
| Lactic acid           | ND                            |       | 4.143 | 4.132 | ND    |       | ND    |       | ND    |       | ND    |       | 4.140 | 4.133 |
| Lysine                | ND                            |       | 3.025 | 3.017 | ND    |       | ND    |       | 1.784 | 1.702 | ND    |       | 1.887 | 1.882 |

|                         |       |       |       |       |       |       |       |       |       |       |       |       |       |       |
|-------------------------|-------|-------|-------|-------|-------|-------|-------|-------|-------|-------|-------|-------|-------|-------|
| Myo-inositol            | 3.557 | 3.527 | 3.542 | 3.528 | 3.558 | 3.526 | 3.558 | 3.523 |       |       | 3.558 | 3.528 | 3.307 | 3.301 |
| Phenylacetylglutamine   | 7.390 | 7.34  | 7.451 | 7.404 | 7.456 | 7.398 | 7.461 | 7.393 | 7.462 | 7.394 | 7.460 | 7.395 | 7.435 | 7.422 |
| Pyroglutamic acid       | 2.074 | 2.002 | 2.074 | 2.002 | 2.485 | 2.378 | 2.426 | 2.383 | 2.072 | 2.004 | 2.073 | 2.000 | 2.397 | 2.392 |
| Serine                  | ND    |       | 3.852 | 3.844 | ND    |       | ND    |       | ND    |       | ND    |       | 3.848 | 3.844 |
| Threonine               | 4.291 | 4.23  | 4.288 | 4.236 | 4.285 | 4.239 | 4.287 | 4.234 | 4.290 | 4.231 | 4.286 | 4.237 |       |       |
| Trigonelline            | 8.870 | 8.82  | 8.866 | 8.819 | 8.871 | 8.808 | 9.141 | 9.109 | 9.156 | 9.102 | 9.160 | 9.100 | 8.861 | 8.823 |
| Trimethylamine-N-oxide  | 3.280 | 3.26  | 3.277 | 3.261 | 3.28  | 3.259 | 3.278 | 3.26  | 3.279 | 3.259 | 3.277 | 3.259 | 3.279 | 3.259 |
| Lactic acid + Threonine | 1.350 | 1.319 | 1.347 | 1.318 | 1.362 | 1.307 | 1.356 | 1.312 | 1.357 | 1.311 | 1.351 | 1.305 | 1.350 | 1.316 |

Op., operator; ND, not determined due to lack of quantifiable resonance

<sup>a</sup> Issued from cysteine

**Online Resource 4** Spectral regions (left and right limits in ppm) selected for signal integration in synthetic urine and calibration range spectra for metabolite quantification using NOESYpr spectra with peak integration and external calibration.

| Metabolite            | Integration mode and operator |       |       |       |       |       |       |       |       |       |
|-----------------------|-------------------------------|-------|-------|-------|-------|-------|-------|-------|-------|-------|
|                       | PI1                           |       | PI1   |       | PI1   |       | PI1   |       | PI1   |       |
|                       | Op. 1                         | Op. 1 | Op. 2 | Op. 2 | Op. 3 | Op. 3 | Op. 4 | Op. 4 | Op. 6 | Op. 6 |
| 1-methylhistidine     | 7.010                         | 6.990 | 7.01  | 6.992 | 7.013 | 6.984 | 7.013 | 6.986 | 7.009 | 6.990 |
| 2-hydroxybutyric acid | 0.930                         | 0.880 | 1.699 | 1.616 | 0.935 | 0.868 | 0.937 | 0.871 | 0.942 | 0.859 |
| 3-methylhistidine     | 7.030                         | 7.010 | 7.029 | 7.012 | 7.039 | 7.013 | 7.046 | 7.013 | 7.032 | 7.009 |
| Acetic acid           | 1.930                         | 1.915 | 1.929 | 1.916 | 1.930 | 1.914 | 1.931 | 1.917 | 1.929 | 1.918 |
| Alanine               | 1.500                         | 1.470 | 1.498 | 1.47  | 1.508 | 1.453 | 1.504 | 1.468 | 1.498 | 1.469 |
| Allantoin             | 5.405                         | 5.390 | 5.411 | 5.386 | 5.413 | 5.383 | 5.405 | 5.387 | 5.406 | 5.380 |
| Citric acid           | 2.690                         | 2.635 | 2.691 | 2.638 | 2.692 | 2.635 | 2.695 | 2.637 | 2.690 | 2.634 |
| Creatine              | 3.946                         | 3.925 | 3.942 | 3.927 | 3.943 | 3.927 | 3.943 | 3.928 | 3.944 | 3.927 |
| Creatinine            | 4.070                         | 4.500 | 4.067 | 4.053 | 4.070 | 4.047 | 4.068 | 4.049 | 4.069 | 4.052 |
| Cystine <sup>a</sup>  | ND                            |       | ND    |       | ND    |       | ND    |       | ND    |       |
| Dimethylamine         | 2.735                         | 2.715 | 2.736 | 2.717 | 2.745 | 2.709 | 2.739 | 2.708 | 2.739 | 2.712 |
| Ethanolamine          | ND                            |       | 3.824 | 3.819 | ND    |       | ND    |       | ND    |       |
| Formic acid           | 8.470                         | 8.450 | 8.478 | 8.445 | 8.469 | 8.453 | 8.470 | 8.447 | 8.480 | 8.440 |
| Fructose              | 3.920                         | 3.890 |       |       | 3.921 | 3.888 |       |       |       |       |
| Glucose               | 5.250                         | 5.230 | 5.249 | 5.234 | 5.251 | 5.228 | 5.257 | 5.224 | 5.250 | 5.226 |
| Glutamine             | ND                            |       | 2.471 | 2.458 | ND    |       | ND    |       | ND    |       |
| Glycerol              | ND                            |       | 3.67  | 3.664 | ND    |       | ND    |       | ND    |       |
| Glycine               | 3.572                         | 3.558 | 3.57  | 3.562 | 3.576 | 3.559 | 3.570 | 3.558 | 3.578 | 3.558 |
| Guanidoacetic acid    | 3.805                         | 3.795 | 3.805 | 3.797 | 3.804 | 3.793 | 3.804 | 3.798 | 3.807 | 3.797 |
| Hippuric acid         | 7.670                         | 7.620 | 7.587 | 7.528 | 7.590 | 7.530 | 7.582 | 7.531 | 7.670 | 7.610 |
| Histidine             | 7.090                         | 7.060 | 7.090 | 7.055 | 7.094 | 7.062 | 7.092 | 7.058 | 7.100 | 7.050 |
| Indoxylsulfate        | 7.230                         | 7.190 | 7.524 | 7.498 | 7.238 | 7.181 | 7.226 | 7.190 | 7.310 | 7.260 |
| Isocitric acid        | 3.000                         | 2.951 | 2.999 | 2.951 | 3.002 | 2.949 | 3.000 | 2.952 | 3.004 | 2.947 |
| Lactic acid           | ND                            |       | 4.143 | 4.132 | 4.143 | 4.110 | ND    |       | 1.351 | 1.305 |
| Lysine                | ND                            |       | 3.025 | 3.017 | ND    |       | ND    |       | ND    |       |



|                         |       |       |       |       |       |       |       |       |       |       |
|-------------------------|-------|-------|-------|-------|-------|-------|-------|-------|-------|-------|
| Myo-inositol            | 3.557 | 3.527 | 3.542 | 3.528 | 3.557 | 3.526 | 3.558 | 3.523 | 3.558 | 3.528 |
| Phenylacetylglutamine   | 7.390 | 7.340 | 7.451 | 7.404 | 7.456 | 7.398 | 7.450 | 7.400 | 7.460 | 7.395 |
| Pyroglutamic acid       | 2.074 | 2.002 | 2.074 | 2.002 | 2.485 | 2.378 | 2.075 | 2.004 | 2.073 | 2.000 |
| Serine                  | ND    |       | 3.852 | 3.844 | ND    |       | ND    |       | ND    |       |
| Threonine               | 4.291 | 4.230 | 4.288 | 4.236 | 4.285 | 4.239 | 4.287 | 4.234 | 4.286 | 4.237 |
| Trigonelline            | 8.870 | 8.820 | 8.866 | 8.819 | 8.872 | 8.808 | 9.141 | 9.109 | 9.160 | 9.100 |
| Trimethylamine-N-oxide  | 3.280 | 3.260 | 3.277 | 3.261 | 3.279 | 3.259 | 3.278 | 3.260 | 3.277 | 3.259 |
| Lactic acid + Threonine | 1.350 | 1.319 | 1.347 | 1.318 | 1.362 | 1.307 | 1.356 | 1.312 | 1.351 | 1.305 |

Op., operator; ND, not determined due to lack of quantifiable resonance

<sup>a</sup> Issued from cysteine

**Online Resource 5** Comparison of zgpr and NOESYpr spectra of synthetic urine. Zoom in on the 2.7-1.4 and 7.78-6.92 ppm regions of representative spectra. red, zgpr spectrum. blue, NOESYpr spectrum; green difference between the two spectra.

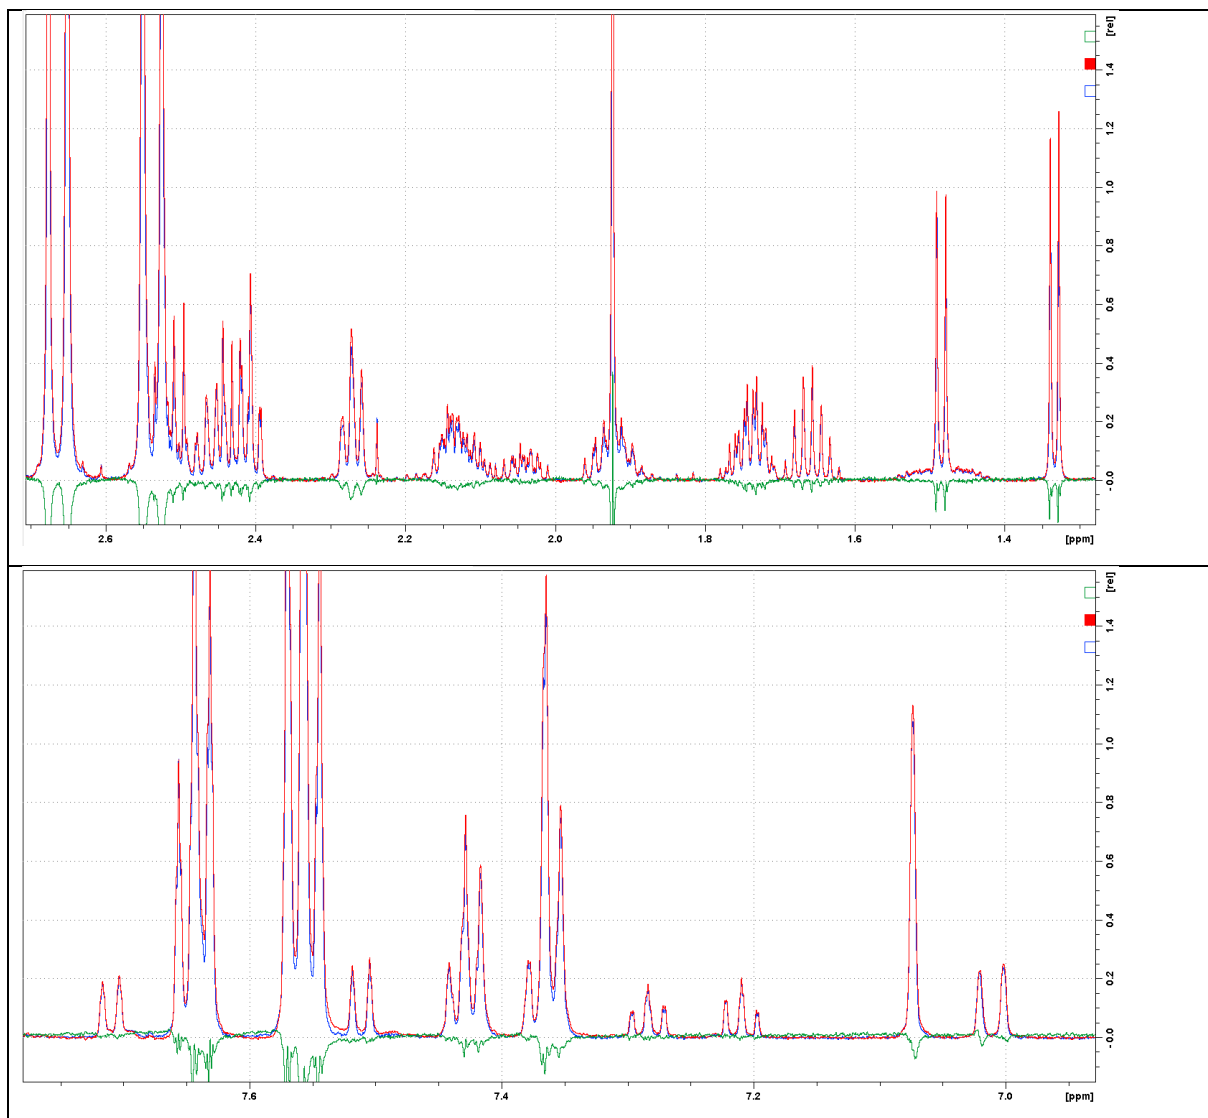

**Online Resource 6** Representative 1D  $^1\text{H}$ -NMR noesypr1d spectrum of synthetic urine with metabolite annotation. Numbers indicate the following metabolites: 1: 1-methylhistidine; 2: 2-hydroxybutyric acid; 3: 3-methylhistidine; 4: acetic acid; 5: alanine; 6: allantoin; 7: citric acid; 8: creatine; 9: creatinine; 10: dimethylamine; 11: ethanolamine; 12: formic acid; 13: fructose; 14: glucose; 15: glutamine; 16: glycerol; 17: glycine; 18: guanidoacetic acid; 19: hippuric acid; 20: histidine; 21: indoxylsulfate; 22: isocitric acid; 23: lactic acid; 24: lysine; 25: myo-inositol; 26: phenylacetylglutamine; 27: pyroglutamic acid; 28: serine; 29: threonine; 30: trigonelline; 31: trimethylamine-N-oxide.

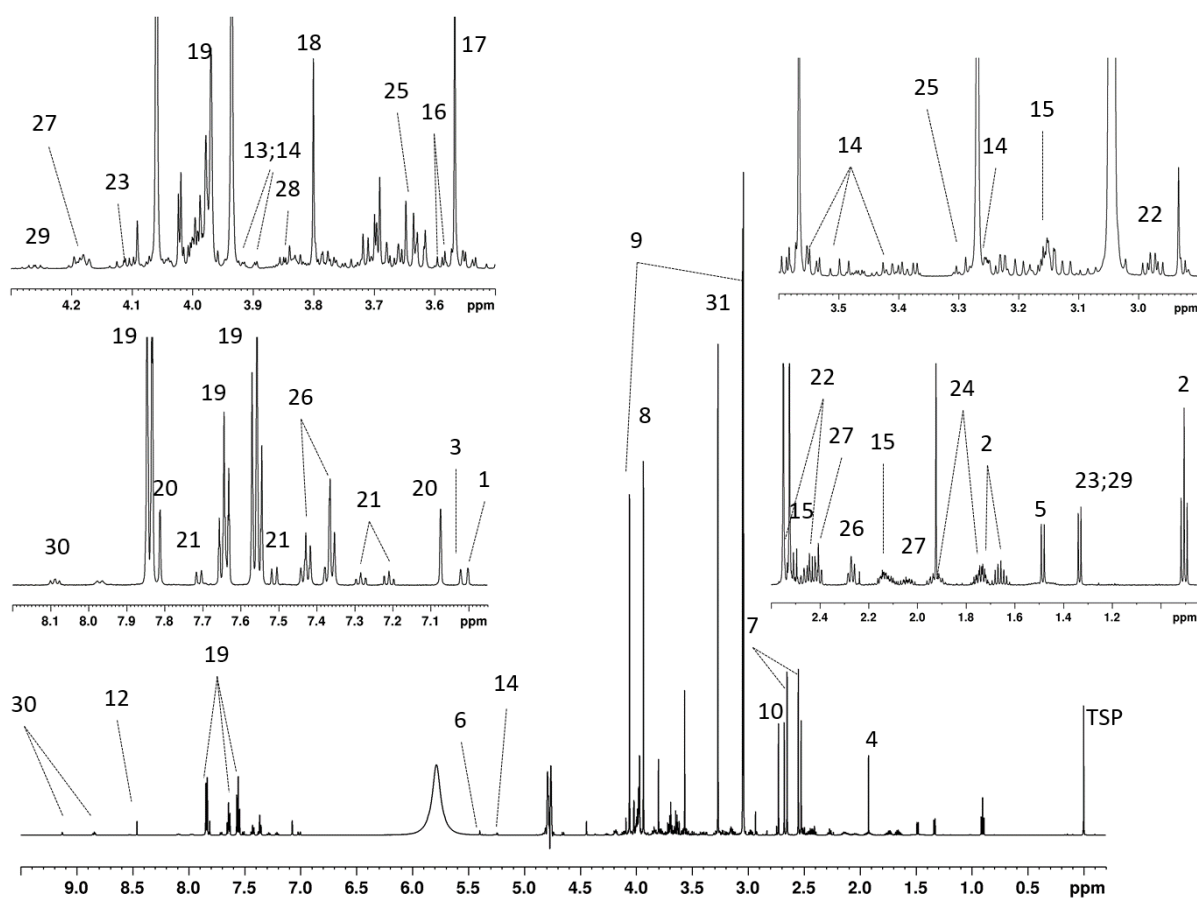

**Online Resource 7** Metabolites quantified from synthetic-urine zgpr spectra using different strategies for resonance integration and calibration. Pink, peak integration with Topspin and internal calibration (PI1-TSPref); blue, peak integration with Topspin and external calibration (PI1-ExtCal); green, peak integration with NMRProcFlow and external calibration (PI2-ExtCal); orange, resonance deconvolution with Mnova and external calibration (DC1-ExtCal); red, resonance deconvolution with NMRDeconvR and external calibration (DC2-ExtCal).

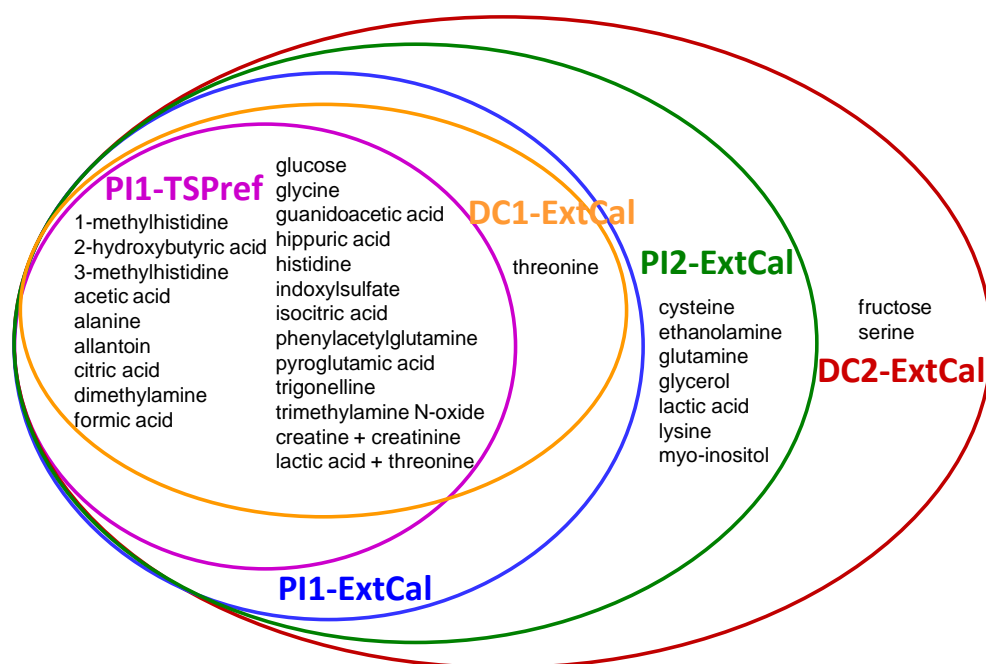

**Online Resource 8** PCA of quantification data of 20 metabolites and two sums of two metabolites of synthetic urine quantified in zgpr spectra by all spectra processing strategies. (A) Scores plot. Squares, TopSpin and TSP referencing (PI1-TSPref); circles, two methods of integration (PI1, TopSpin; PI2, NMRProcFlow) or deconvolution (DC1, Mnova; DC2, NMRDeconvR) with external calibration; triangle, plot of the theoretical sample (Theor). (B) Loadings plot with metabolite annotation.

**A**

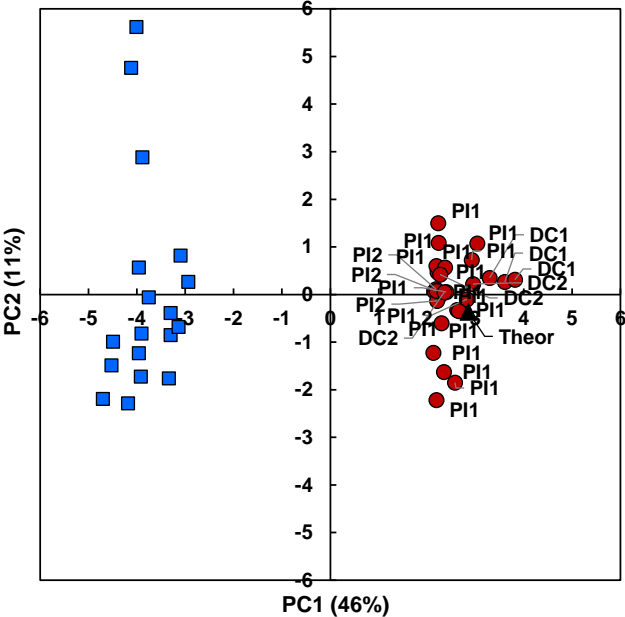

**B**

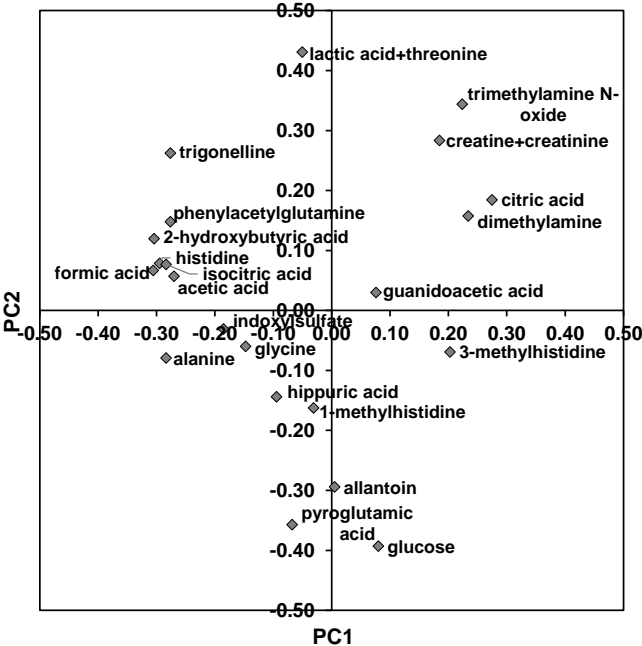

**Online Resource 9** Kruskal-Wallis test for operator effect for quantification of 20 metabolites and two sums of metabolites using zgpr spectra and TopSpin integration with external calibration.

| Metabolites            | $\chi^2$ | df | p-value   |
|------------------------|----------|----|-----------|
| 1-methylhistidine      | 7.924    | 5  | 1.600E-01 |
| 2-hydroxybutyric acid  | 0.111    | 5  | 1.000E+00 |
| 3-methylhistidine      | 12.766   | 5  | 2.600E-02 |
| Acetic acid            | 3.770    | 5  | 5.830E-01 |
| Alanine                | 2.637    | 5  | 7.560E-01 |
| Allantoin              | 0.813    | 5  | 9.760E-01 |
| Citric acid            | 3.129    | 5  | 6.800E-01 |
| Dimethylamine          | 7.924    | 5  | 1.600E-01 |
| Formic acid            | 4.462    | 5  | 4.850E-01 |
| Glucose                | 0.602    | 5  | 9.880E-01 |
| Glycine                | 15.971   | 5  | 7.000E-03 |
| Guanidoacetic acid     | 12.743   | 5  | 2.600E-02 |
| Hippuric acid          | 12.813   | 5  | 2.500E-02 |
| Histidine              | 8.020    | 5  | 1.550E-01 |
| Indoxylsulfate         | 2.591    | 5  | 7.630E-01 |
| Isocitric acid         | 3.339    | 5  | 6.480E-01 |
| Phenylacetylglutamine  | 0.298    | 5  | 9.980E-01 |
| Pyroglutamic acid      | 11.901   | 5  | 3.600E-02 |
| Trigonelline           | 0.953    | 5  | 9.660E-01 |
| Trimethylamine N-oxide | 9.515    | 5  | 9.000E-02 |
| Creatine+Creatinine    | 1.795    | 5  | 8.770E-01 |
| Lactic acid+Threonine  | 14.778   | 5  | 1.100E-02 |

df, degrees of freedom

**Online Resource 10** Precision for 21 or 29 metabolites and two sums of metabolites quantified from synthetic-urine NOESYpr spectra using two spectra processing strategies, peak integration with TopSpin (PI1) or peak deconvolution with NMRDeconvR (DC2) performed by five or one operators (op.), and external calibration (ExtCal).

| Metabolite              | Precision (CV %)                      |       |                                  |
|-------------------------|---------------------------------------|-------|----------------------------------|
|                         | PI1-ExtCal<br>Mean value<br>(n=5 op.) | SD    | DC2-ExtCal<br>Value<br>(n=1 op.) |
| 1-methylhistidine       | 2.19                                  | 1.29  | 5.06                             |
| 2-hydroxybutyric acid   | 0.20                                  | 0.05  | 0.71                             |
| 3-methylhistidine       | 1.31                                  | 0.24  | 2.57                             |
| Acetic acid             | 0.22                                  | 0.01  | 3.53                             |
| Alanine                 | 0.23                                  | 0.05  | 1.85                             |
| Allantoin               | 26.99                                 | 4.37  | 3.01                             |
| Citric acid             | 0.14                                  | 0.005 | 0.92                             |
| Cysteine <sup>a</sup>   | ND                                    |       | 9.91                             |
| Dimethylamine           | 0.36                                  | 0.03  | 1.82                             |
| Ethanolamine            | ND                                    |       | 0.96                             |
| Formic acid             | 1.16                                  | 0.10  | 2.33                             |
| Glucose                 | 42.60                                 | 12.11 | 4.81                             |
| Glutamine               | ND                                    |       | 3.12                             |
| Glycerol                | ND                                    |       | 4.42                             |
| Glycine                 | 0.26                                  | 0.10  | 1.94                             |
| Guanidoacetic acid      | 0.52                                  | 0.03  | 2.93                             |
| Hippuric acid           | 0.21                                  | 0.12  | 0.66                             |
| Histidine               | 0.67                                  | 0.16  | 2.53                             |
| Indoxylsulfate          | 2.56                                  | 0.16  | 3.35                             |
| Isocitric acid          | 1.64                                  | 0.05  | 2.56                             |
| Lactic acid             | ND                                    |       | 4.20                             |
| Lysine                  | ND                                    |       | 4.20                             |
| Myo-inositol            | 1.71                                  | 0.19  | 3.26                             |
| Phenylacetylglutamine   | 0.50                                  | 0.08  | 1.72                             |
| Pyroglutamic acid       | 2.83                                  | 1.30  | 4.05                             |
| Serine                  | ND                                    |       | 4.28                             |
| Threonine               | ND                                    |       | 6.79                             |
| Trigonelline            | 1.42                                  | 0.35  | 3.82                             |
| Trimethylamine-N-oxide  | 0.24                                  | 0.00  | 2.04                             |
| Creatine + Creatinine   | 3.01                                  | 0.01  | 3.81                             |
| Lactic acid + Threonine | 1.05                                  | 1.68  | 1.93                             |

op., operator; SD, standard deviation; ND, not determined due to lack of quantifiable resonance

<sup>a</sup> Estimated from cystine

**Online Resource 11** Relative trueness for 21 or 29 metabolites and two sums of metabolites quantified from synthetic-urine NOESYpr spectra using two spectra processing strategies, peak integration with TopSpin (PI1) or peak deconvolution with NMRDeconvR (DC2) performed by five or one operators, and external calibration.

| Metabolite              | Relative trueness (%)                 |       |                                  |
|-------------------------|---------------------------------------|-------|----------------------------------|
|                         | PI1-ExtCal<br>Mean value<br>(n=5 op.) | SD    | DC2-ExtCal<br>Value<br>(n=1 op.) |
| 1-methylhistidine       | -4.28                                 | 7.87  | 3.41                             |
| 2-hydroxybutyric acid   | 3.35                                  | 0.63  | 5.21                             |
| 3-methylhistidine       | 3.81                                  | 3.95  | 3.39                             |
| Acetic acid             | 2.50                                  | 0.05  | 4.86                             |
| Alanine                 | 0.81                                  | 0.13  | 1.45                             |
| Allantoin               | 5.99                                  | 0.09  | 6.77                             |
| Citric acid             | 1.40                                  | 0.01  | -3.14                            |
| Cysteine <sup>a</sup>   | ND                                    |       | -3.65                            |
| Dimethylamine           | 0.95                                  | 1.37  | 4.09                             |
| Ethanolamine            | ND                                    |       | 3.47                             |
| Formic acid             | -3.23                                 | 0.12  | 0.78                             |
| Glucose                 | 9.93                                  | 7.16  | -6.38                            |
| Glutamine               | ND                                    |       | -4.95                            |
| Glycerol                | ND                                    |       | -3.26                            |
| Glycine                 | -0.71                                 | 1.49  | 5.08                             |
| Guanidoacetic acid      | -1.25                                 | 0.41  | -1.63                            |
| Hippuric acid           | 0.72                                  | 0.40  | 0.42                             |
| Histidine               | 3.11                                  | 0.19  | 2.04                             |
| Indoxylsulfate          | -0.08                                 | 1.87  | 1.09                             |
| Isocitric acid          | -5.69                                 | 0.44  | -0.31                            |
| Lactic acid             | ND                                    |       | 8.04                             |
| Lysine                  | 2.94                                  |       | 2.67                             |
| Myo-inositol            | -18.47                                | 0.68  | -0.88                            |
| Phenylacetylglutamine   | 0.85                                  | 0.09  | 0.37                             |
| Pyroglutamic acid       | -6.55                                 | 5.69  | -2.13                            |
| Serine                  | ND                                    |       | 7.83                             |
| Threonine               | ND                                    |       | 4.30                             |
| Trigonelline            | -0.43                                 | 0.36  | 1.13                             |
| Trimethylamine-N-oxide  | 1.99                                  | 0.32  | 5.63                             |
| Creatine + Creatinine   | -4.75                                 | 3.85  | 1.45                             |
| Lactic acid + Threonine | 8.36                                  | 14.53 | 5.97                             |

op., operator; SD, standard deviation; ND, not determined due to lack of quantifiable resonance

<sup>a</sup> Estimated from cystine
